# Supplementary material for: Evolution of diagenetic conditions and burial history in Buntsandstein Gp. fractured sandstones (Upper Rhine Graben) from in-situ δ18O of quartz and 40Ar/39Ar geochronology of K-feldspar overgrowths
Source: Springer Nature journal article supplement (doi:10.1007/s00531-021-02080-2), 2021-07-09
Supplement: MOESM1 [file 531_2021_2080_MOESM1_ESM.xlsx]

## Sheet: Roem
Age (Ma)	Horizon name	Depth(m)	Thickness (m)	Event -type	Layer name	Erosion	Lithology	PSE element
0.00	quaternary	-25	125	Deposition	quaternary		Sandstone (clay rich)	Reservoir Rock
2.50	quaternary_1	100	100	Deposition	quaternary_1		Sandstone (clay rich)	Reservoir Rock
3.00	quaternary_2	200	0	Deposition	quaternary_2		Sandstone (clay rich)	Reservoir Rock
5.00	miocene erosion	200	0	Erosion		-50
12.00	neogene	200	395	Deposition	neogene	50	Shale (organic lean, sandy)	Source Rock
20.00	neogene_1	595	346	Deposition	neogene_1		Shale (organic lean, sandy)	Source Rock
28.00	neogene_2	941	659	Deposition	neogene_2		Shale (organic lean, sandy)	Reservoir Rock
31.00	paleogene	1600	200	Deposition	paleogene		Siltstone (organic rich, 2-3% TOC)	Source Rock
33.00	paleogene_1	1800	200	Deposition	paleogene_1		Siltstone (organic rich, 2-3% TOC)	Source Rock
38.00	paleogene_2	2000	455	Deposition	paleogene_2		Siltstone (organic rich, 2-3% TOC)	Seal Rock
55.00	Hiatus Eocene	2455	0	Erosion	latecretaceousandpaleocene	-1530
90.00	hiatus cretaceous	2455	0	Hiatus
110.00	missing Lower Cretaceous	2455	0	Deposition	missing jura+cretaceous	200	Limestone (micrite)	Seal Rock
130.00	lowercretaceous	2455	0	Deposition	missing lower cretaceous	200	Limestone (micrite)	Overburden Rock
150.00	missing upper jurassic	2455	0	Deposition	missing jurassic	350	Dolomite (organic lean, silty)	Reservoir Rock
165.00	jurassic rest	2455	0	Deposition	missing jura	400	Limestone (micrite)	Reservoir Rock
180.00	toarcian source rock	2455	0	Deposition	mssing sr	30	Shale (organic rich, 8% TOC)	Source Rock
182.00	lowerjura	2455	0	Deposition	missing lowerjura	250	Limestone (organic rich - 1-2% TOC)	Overburden Rock
205.00	keuper_3	2455	105	Deposition	keuper	100	Sandstone (subarkose, dolomite rich)	Reservoir Rock
218.00	Norian erosion	2560	0	Erosion	norian erosion	-70
220.67	keuper_1	2560	0	Deposition	keuper_1	50	Sandstone (subarkose, dolomite rich)	Reservoir Rock
225.33	keuper_2	2560	90	Deposition	keuper_2	20	Sandstone (subarkose, dolomite rich)	Reservoir Rock
230.00	musch	2650	25	Deposition	musch		Dolomite (organic lean, sandy)	Reservoir Rock
235.00	musch_1	2675	50	Deposition	musch_1		Dolomite (organic lean, sandy)	Reservoir Rock
240.00	musch_2	2725	50	Deposition	musch_2		Dolomite (organic lean, sandy)	Reservoir Rock
245.00	bunt	2775	75	Deposition	bunt		Sandstone (clay poor)	Reservoir Rock
247.67	bunt_1	2850	275	Deposition	bunt_1		Sandstone (clay poor)	Reservoir Rock
250.33	bunt_2	3125	50	Deposition	bunt_2		Sandstone (clay poor)	Reservoir Rock
253.00	Base	3175

## Sheet: Cleebg
0.00	quaternary	-25	0	Deposition	quaternary	0	Sandstone (clay rich)	Reservoir Rock
2.50	quaternary_1	-25	0	Deposition	quaternary_1	0	Sandstone (clay rich)	Reservoir Rock
3.00	quaternary_2	-25	0	Deposition	quaternary_2	0	Sandstone (clay rich)	Reservoir Rock
5.00	miocene erosion	-25	0	Erosion		-570
12.00	neogene	-25	0	Deposition	neogene	20	Shale (organic lean, sandy)	Source Rock
20.00	neogene_1	-25	0	Deposition	neogene_1	50	Shale (organic lean, sandy)	Source Rock
30.30	neogene_2	-25	0	Deposition	neogene_2	60	Shale (organic lean, sandy)	Reservoir Rock
32.00	paleogene	-25	0	Deposition	paleogene	70	Siltstone (organic rich, 2-3% TOC)	Source Rock
33.90	paleogene_1	-25	0	Deposition	paleogene_1	50	Siltstone (organic rich, 2-3% TOC)	Source Rock
38.00	paleogene_2	-25	0	Deposition	paleogene_2	50	Siltstone (organic rich, 2-3% TOC)	Seal Rock
55.00	Hiatus Eocene	-25	0	Erosion	latecretaceousandpaleocene	-1150
90.00	hiatus cretaceous	-25	0	Hiatus
110.00	missing Lower Cretaceous	-25	0	Deposition	missing jura+cretaceous	200	Limestone (micrite)	Seal Rock
130.00	lowercretaceous	-25	0	Deposition	missing lower cretaceous	200	Limestone (micrite)	Overburden Rock
150.00	missing upper jurassic	-25	0	Deposition	missing jurassic	350	Dolomite (organic lean, silty)	Reservoir Rock
165.00	jurassic rest	-25	0	Deposition	missing jura	400	Limestone (micrite)	Reservoir Rock
180.00	toarcian source rock	-25	0	Deposition	mssing sr	0	Shale (organic rich, 8% TOC)	Source Rock
182.00	lowerjura	-25	0	Deposition	missing lowerjura	0	Limestone (organic rich - 1-2% TOC)	Overburden Rock
205.00	keuper_3	-25	0	Deposition	keuper	0	Sandstone (subarkose, dolomite rich)	Reservoir Rock
218.00	Norian erosion	-25	0	Erosion	norian erosion	-70
220.67	keuper_1	-25	0	Deposition	keuper_1	170	Sandstone (subarkose, dolomite rich)	Reservoir Rock
225.33	keuper_2	-25	0	Deposition	keuper_2	45	Sandstone (subarkose, dolomite rich)	Reservoir Rock
230.00	musch	-25	0	Deposition	musch	25	Dolomite (organic lean, sandy)	Reservoir Rock
235.00	musch_1	-25	0	Deposition	musch_1	50	Dolomite (organic lean, sandy)	Reservoir Rock
240.00	musch_2	-25	0	Deposition	musch_2	50	Dolomite (organic lean, sandy)	Reservoir Rock
245.00	bunt	-25	25	Deposition	bunt		Sandstone (clay poor)	Reservoir Rock
247.67	bunt_1	0	275	Deposition	bunt_1		Sandstone (clay poor)	Reservoir Rock
250.33	bunt_2	275	50	Deposition	bunt_2		Sandstone (clay poor)	Reservoir Rock
253.00	Base	325

## Sheet: Soultz
0.00	quaternary	-25	25	Deposition	quaternary		Sandstone (clay rich)	Reservoir Rock
2.50	quaternary_1	0	25	Deposition	quaternary_1		Sandstone (clay rich)	Reservoir Rock
3.00	quaternary_2	25	0	Deposition	quaternary_2		Sandstone (clay rich)	Reservoir Rock
5.00	miocene erosion	25	0	Erosion		-50
12.00	neogene	25	0	Deposition	neogene	50	Shale (organic lean, sandy)	Source Rock
20.00	neogene_1	25	0	Deposition	neogene_1		Shale (organic lean, sandy)	Source Rock
30.30	neogene_2	25	425	Deposition	neogene_2		Shale (organic lean, sandy)	Reservoir Rock
32.00	paleogene	450	275	Deposition	paleogene		Siltstone (organic rich, 2-3% TOC)	Source Rock
33.90	paleogene_1	725	200	Deposition	paleogene_1		Siltstone (organic rich, 2-3% TOC)	Source Rock
38.00	paleogene_2	925	210	Deposition	paleogene_2		Siltstone (organic rich, 2-3% TOC)	Seal Rock
55.00	Hiatus Eocene	1135	0	Erosion	latecretaceousandpaleocene	-1150
90.00	hiatus cretaceous	1135	0	Hiatus
110.00	missing Lower Cretaceous	1135	0	Deposition	missing jura+cretaceous	200	Limestone (micrite)	Seal Rock
130.00	lowercretaceous	1135	0	Deposition	missing lower cretaceous	200	Limestone (micrite)	Overburden Rock
150.00	missing upper jurassic	1135	0	Deposition	missing jurassic	350	Dolomite (organic lean, silty)	Reservoir Rock
165.00	jurassic rest	1135	90	Deposition	missing jura	400	Limestone (micrite)	Reservoir Rock
180.00	toarcian source rock	1225	70	Deposition	mssing sr	0	Shale (organic rich, 8% TOC)	Source Rock
182.00	lowerjura	1295	130	Deposition	missing lowerjura	0	Limestone (organic rich - 1-2% TOC)	Overburden Rock
205.00	keuper_3	1425	10	Deposition	keuper	0	Sandstone (subarkose, dolomite rich)	Reservoir Rock
218.00	Norian erosion	1435	0	Erosion	norian erosion	-50
220.67	keuper_1	1435	170	Deposition	keuper_1	50	Sandstone (subarkose, dolomite rich)	Reservoir Rock
225.33	keuper_2	1605	45	Deposition	keuper_2	0	Sandstone (subarkose, dolomite rich)	Reservoir Rock
230.00	musch	1650	25	Deposition	musch		Dolomite (organic lean, sandy)	Reservoir Rock
235.00	musch_1	1675	50	Deposition	musch_1		Dolomite (organic lean, sandy)	Reservoir Rock
240.00	musch_2	1725	50	Deposition	musch_2		Dolomite (organic lean, sandy)	Reservoir Rock
245.00	bunt	1775	75	Deposition	bunt		Sandstone (clay poor)	Reservoir Rock
247.67	bunt_1	1850	275	Deposition	bunt_1		Sandstone (clay poor)	Reservoir Rock
250.33	bunt_2	2125	50	Deposition	bunt_2		Sandstone (clay poor)	Reservoir Rock
253.00	Base	2175

## Sheet: Heatflow
Age	Heatflow
250	65
240	70
230	71
220	72
210	73
200	74
190	75
180	80
170	75
160	74
150	73
140	72
130	71
120	70
110	69
100	70
90	72
80	85
70	95
60	100
50	100
40	95
35	100
30	95
20	90
17	88
10	85
0	82

## Sheet: Output-temperature
Output_Burial models
Model : Roem				Model : Soultz			Model : Cleebourg
(Sub)layer: bunt_2				(Sub)layer: bunt_2			(Sub)layer: bunt_2
	Temperature				Temperature			Temperature
Time	Temperature			Time	Temperature		Time	Temperature
Ma[Ma]	Celsius[°C]			Ma[Ma]	Celsius[°C]		Ma[Ma]	Celsius[°C]
0.00	167.04			0.00	93.49		0.00	25.65
2.00	168.17			2.00	93.63		2.00	25.65
2.50	168.46			2.50	93.34		2.50	25.65
3.00	168.42			3.00	92.70		3.00	25.65
3.38	168.56			5.00	92.77		5.00	25.66
5.00	169.50			12.00	95.42		12.00	45.69
9.14	174.48			17.00	94.72		17.00	45.21
12.00	183.21			20.00	94.31		20.00	44.91
13.60	184.53			23.00	94.27		23.00	44.30
17.00	181.84			30.30	92.69		30.30	42.71
20.00	178.93			32.00	77.49		32.00	39.67
23.00	176.80			33.90	67.06		33.90	36.64
25.00	174.94			38.00	57.46		38.00	34.30
25.56	174.04			40.00	56.09		40.00	34.01
28.00	166.62			55.00	44.70		55.00	31.79
31.00	123.80			90.00	85.20		90.00	70.71
33.00	110.67			93.00	85.20		93.00	70.71
38.00	95.78			110.00	85.15		110.00	70.67
40.00	91.45			130.00	80.41		130.00	65.59
40.59	90.09			150.00	74.41		150.00	59.28
50.36	63.26			165.00	69.72		165.00	52.77
55.00	48.22			180.00	57.22		180.00	36.25
64.64	67.75			182.00	48.34		182.00	36.25
72.50	81.33			200.00	42.91		200.00	36.25
84.09	103.70			205.00	41.08		205.00	36.25
90.00	117.60			218.00	40.71		218.00	36.26
93.00	117.50			220.67	42.49		220.67	38.64
94.48	117.27			225.33	35.98		225.33	33.78
110.00	115.77			230.00	34.58		230.00	32.44
119.07	112.30			235.00	33.92		235.00	31.81
130.00	109.46			240.00	32.60		240.00	30.52
150.00	102.36			245.00	31.25		245.00	29.21
165.00	97.22			247.67	29.17		247.67	28.55
167.21	95.06			250.33	20.83		250.33	20.77
180.00	86.70			252.15	20.27		252.15	20.25
181.99	81.10			253.00	20.00		253.00	20.00
182.00	81.08
194.23	66.61
205.00	56.26
218.00	45.54
220.67	48.11
221.65	47.67
225.33	46.06
230.00	41.12
235.00	39.79
240.00	37.63
245.00	35.48
247.67	32.72
249.55	25.38
250.33	22.09
252.15	21.28
253.00	20.95

## Sheet: Recapd18
Sample ID	Location	Stratigraphy	Quartz type	n	$\delta^{18}O$ Min	$\delta^{18}O$ Mean	$\delta^{18}O$ Max	\sigma
A-2783	Roemerberg	Upper Buntsandstein	Detrital	15	3.63652	10.2077	15.5627	0.187467
			Overgrowth	4	18.8065	20.1866	23.4288	0.191897
B-2882	Roemerberg	Middle Buntsandstein	Detrital	46	2.75164	10.7193	13.4119	0.26289
			Overgrowth	54	16.122	19.4804	23.3242	0.202063
D-2537	Roemerberg	Middle Buntsandstein	Detrital	55	3.7249	10.9398	14.9873	0.0588184
			Overgrowth	67	14.1142	19.0911	24.6384	0.0687356
E-2671	Roemerberg	Upper Buntsandstein	Detrital	3	9.10315	11.4469	13.8743	0.256486
			Overgrowth	14	17.144	19.4963	22.3117	0.232671
F-3225	Roemerberg	Middle Buntsandstein	Detrital	65	1.59326	8.12472	13.462	0.206149
			Overgrowth	44	10.7573	15.7862	19.7118	0.191763
EPS11360	Soultz-ss-forêts	Middle Buntsandstein	Detrital	84	1.15438	10.7748	16.4949	0.155625
			Overgrowth	25	14.5642	18.0968	22.2313	0.143934
K466	Cleebourg	Lower Buntsandstein	Detrital	10	3.65215	9.10264	15.6241	0.191087
			Overgrowth	10	16.7281	20.1402	22.8804	0.195504
X009	Marlenheim	Middle Buntsandstein	Detrital	16	10.2534	12.4564	21.2284	0.0690378
	Kobus		Overgrowth	37	16.8566	22.1613	26.0597	0.0650872
X024	Marlenheim	Middle Buntsandstein	Detrital	70	-3.19246	9.04687	15.6795	0.0551764
	Rocher du Lion		Overgrowth	49	12.8098	18.986	23.0802	0.0605917
B002	Reichenberg	Middle Buntsandstein	Detrital	4	9.24417	10.8998	12.2706	0.060512
			Overgrowth	2	18.7176	18.8821	19.0465	0.055872

## Sheet: d18-A2783
Analysis Name	number	distance	ratio	Property	d18O	Error	depth	debut	fin		DeltaO		Dq	Oq	error	Min	Mean	Max	n	t	depth
A2783@1	1			1	10.2344	0.200512	1800	9	9				10.2344		0.187467	3.63652	10.2077	15.5627	15	140	2783
A2783@2	2			6			1800	11	12		0.755748									140	2783
A2783@3	3			1	11.5092	0.18982	1800	14	14				11.5092		error	Min	Mean	Max	n	140	2783
A2783@4	4			1	14.112	0.196565	1800						14.112		0.191897	18.8065	20.1866	23.4288	4	140	2783
A2783@5	5			1	8.2248	0.215301	1800						8.2248							140	2783
A2783@6	6			1	12.2732	0.166611	1800						12.2732							140	2783
A2783@7	7			1	13.0764	0.199317	1800						13.0764							140	2783
A2783@8	8			1	15.5627	0.164991	1800						15.5627							140	2783
A2783@9	9	2.56e-05	0.8	2	23.4288	0.192826	1800							23.4288						140	2783
A2783@10	10			1	13.5665	0.184754	1800						13.5665							140	2783
A2783@11	11	5.69e-05	0.87007	2	18.8777	0.195944	1800							18.8777						140	2783
A2783@12	12	3.48e-05	0.532135	2	19.6335	0.181333	1800							19.6335						140	2783
A2783@13	13			1	13.2253	0.191351	1800						13.2253							140	2783
A2783@14	14	3.18e-05	0.739921	2	18.8065	0.197485	1800							18.8065						140	2783
A2783@15	15			1	3.63652	0.183575	1800						3.63652							140	2783
A2783@16	16			1	4.47634	0.169831	1800						4.47634							140	2783
A2783@17	17			1	9.18668	0.172101	1800						9.18668							140	2783
A2783@18	18			1	9.71962	0.179355	1800						9.71962							140	2783
A2783@19	19			1	8.02769	0.179921	1800						8.02769							140	2783
A2783@20	20			1	6.28366	0.217999	1800						6.28366							140	2783
A2783@21	21			4	23.0372	0.312951	1800													140	2783
A2783@22	22			4	23.299	0.314034	1800													140	2783

## Sheet: d18-B2882
Analysis Name	numero	distance to grain	ratio	Property	d 18O /16O	Error	DEPTH	debut	fin		DeltaO		Dq	Oq	error	Min	Mean	Max	n	t	depth
R12882@1	1			4	16.8411	0.178178	1850	2	5		4.38412				0.26289	2.75164	10.7193	13.4119	46	140	2587
R12882@2	2	0.00011	0.916667	2	17.4954	0.242238	1850	12	16		3.30765			17.4954						140	2587
R12882@3	3	7.5e-05	0.625	2	18.513	0.217458	1850	28	30		-0.308753			18.513	error	Min	Mean	Max	n	140	2587
R12882@4	4	5e-05	0.416667	2	20.4489	0.232475	1850	36	38		0.825585			20.4489	0.202063	16.122	19.4804	23.3242	54	140	2587
R12882@5	5	3e-05	0.25	2	21.8795	0.224048	1850	42	46		0.989363			21.8795						140	2587
R12882@6	6			1	11.9772	0.244238	1850	49	51		0.713864		11.9772							140	2587
R12882@7	7			1	11.8474	0.21831	1850	60	64		5.09124		11.8474							140	2587
R12882@8	8			1	11.4452	0.227797	1850	69	72		4.17053		11.4452							140	2587
R12882@9	9			1	11.4937	0.239986	1850	73	76		2.04551		11.4937							140	2587
R12882@10	10			1	11.6816	0.224308	1850	78	80		1.28861		11.6816							140	2587
R12882@11	11			1	11.9304	0.211017	1850	85	87		2.4854		11.9304							140	2587
R12882@12	12	7.4447e-05	0.863298	2	18.5708	0.240316	1850	93	94		0.70987			18.5708						140	2587
R12882@13	13	8.2e-05	0.950884	2	17.8734	0.222417	1850	99	101		1.04001			17.8734						140	2587
R12882@14	14	5.5544e-05	0.644096	2	19.0387	0.218406	1850	107	109		2.33775			19.0387						140	2587
R12882@15	15	4.1154e-05	0.477228	2	18.4609	0.226252	1850	110	113		2.98978			18.4609						140	2587
R12882@16	16	3.11454e-05	0.361166	2	21.1811	0.236283	1850							21.1811						140	2587
R12882@17	17			4	15.7841	0.226621	1850													140	2587
R12882@18	18			1	11.1064	0.217385	1850						11.1064							140	2587
R12882@19	19			1	10.5215	0.210918	1850						10.5215							140	2587
R12882@20	20			1	11.146	0.225069	1850						11.146							140	2587
R12882@21	21			1	11.3645	0.218445	1850						11.3645							140	2587
R12882@22	22			1	11.1226	0.231488	1850						11.1226							140	2587
R12882@23	23			1	11.9348	0.237318	1850						11.9348							140	2587
R12882@24	24			4	21.5571	0.219886	1850													140	2587
R12882@25	25			4	16.7019	0.170556	1850													140	2587
R12882@26	26			4	16.558	0.180098	1850													140	2587
R12882@27	27			4	21.0913	0.240522	1850													140	2587
R12882@28	28	6.5874e-05	0.78178	2	17.3493	0.218161	1850							17.3493						140	2587
R12882@29	29	7.02567e-05	0.833793	2	17.5296	0.212001	1850							17.5296						140	2587
R12882@30	30	7.25598e-05	0.861126	2	17.6581	0.21971	1850							17.6581						140	2587
R12882@31	31			6			1850													140	2587
R12882@32	32			6			1850													140	2587
R12882@33	33			6			1850													140	2587
R12882@34	34			6			1850													140	2587
R12882@35	35			1	12.8039	0.219374	1850						12.8039							140	2587
R12882@36	36	4.3885e-05	0.8777	2	20.2243	0.236329	1850							20.2243						140	2587
R12882@37	37	4.55562e-05	0.911124	2	20.5578	0.269436	1850							20.5578						140	2587
R12882@38	38	2.7552e-05	0.55104	2	21.3833	0.239435	1850							21.3833						140	2587
R12882@39	39			1	10.7329	0.234483	1850						10.7329							140	2587
R12882@40	40			1	10.6782	0.222355	1850						10.6782							140	2587
R12882@41	41			1	10.7294	0.2318	1850						10.7294							140	2587
R12882@42	42	9.52695e-05	0.934015	2	19.3004	0.222807	1850							19.3004						140	2587
R12882@43	43	7.0247e-05	0.688696	2	19.5582	0.242136	1850							19.5582						140	2587
R12882@44	44	4.52245e-05	0.443377	2	22.1202	0.254252	1850							22.1202						140	2587
R12882@45	45	2.0202e-05	0.198059	2	20.2897	0.243335	1850							20.2897						140	2587
R12882@46	46	6.65844e-05	0.652788	2	19.51	0.196366	1850							19.51						140	2587
R12882@47	47			1	9.75447	0.21201	1850						9.75447							140	2587
R12882@48	48			1	10.0867	0.183807	1850						10.0867							140	2587
R12882@49	49	0.000125	0.961538	2	20.5894	0.162608	1850							20.5894						140	2587
R12882@50	50	9e-05	0.692308	2	20.8778	0.177269	1850							20.8778						140	2587
R12882@51	51	5.5e-05	0.423077	2	21.3033	0.203801	1850							21.3033						140	2587
R12882@52	52			1	8.64734	0.194324	1850						8.64734							140	2587
R12882@53	53			1	9.23496	0.925921	1850						9.23496							140	2587
R12882@54	54			1	11.0626	1.56656	1850						11.0626							140	2587
R12882@55	55			1	13.4104	0.668251	1850						13.4104							140	2587
R12882@56	56			4	15.3964	0.155074	1850													140	2587
R12882@57	57			4	16.3836	0.18531	1850													140	2587
R12882@58	58			4	14.6399	0.150464	1850													140	2587
R12882@59	59			4	14.456	0.166027	1850													140	2587
R12882@60	60	0.000115658	0.96382	2	16.122	0.19116	1850							16.122						140	2587
R12882@61	61	9.03585e-05	0.752987	2	16.9347	0.191042	1850							16.9347						140	2587
R12882@62	62	6.50585e-05	0.542154	2	17.2974	0.189798	1850							17.2974						140	2587
R12882@63	63	3.97585e-05	0.331321	2	18.2267	0.18825	1850							18.2267						140	2587
R12882@64	64	1.44585e-05	0.120487	2	21.2133	0.190213	1850							21.2133						140	2587
R12882@65	65			1	10.7293	0.181514	1850						10.7293							140	2587
R12882@66	66			1	10.7281	0.212838	1850						10.7281							140	2587
R12882@67	67			1	10.6687	0.158116	1850						10.6687							140	2587
R12882@68	68			1	11.1125	0.206602	1850						11.1125							140	2587
R12882@69	69	0.000156	0.975	2	19.1537	0.199738	1850							19.1537						140	2587
R12882@70	70	0.000116	0.725	2	18.6169	0.191868	1850							18.6169						140	2587
R12882@71	71	7.6e-05	0.475	2	21.2122	0.16572	1850							21.2122						140	2587
R12882@72	72	3.6e-05	0.225	2	23.3242	0.186146	1850							23.3242						140	2587
R12882@73	73	6.1125e-05	0.815	2	19.259	0.200167	1850							19.259						140	2587
R12882@74	74	5.2226e-05	0.696347	2	20.0336	0.184302	1850							20.0336						140	2587
R12882@75	75	6.82337e-05	0.909782	2	19.8376	0.198331	1850							19.8376						140	2587
R12882@76	76	3.52365e-05	0.46982	2	21.3045	0.184981	1850							21.3045						140	2587
R12882@77	77			1	12.1205	0.184055	1850						12.1205							140	2587
R12882@78	78	6.2e-05	0.846243	2	20.7577	0.172315	1850							20.7577						140	2587
R12882@79	79	3.7e-05	0.505016	2	19.6246	0.179315	1850							19.6246						140	2587
R12882@80	80	1.2e-05	0.163789	2	22.0463	0.211028	1850							22.0463						140	2587
R12882@81	81			1	8.72377	0.177455	1850						8.72377							140	2587
R12882@82	82			1	4.53009	0.574216	1850						4.53009							140	2587
R12882@83	83			1	5.65128	0.217692	1850						5.65128							140	2587
R12882@84	84			1	2.75164	0.174724	1850						2.75164							140	2587
R12882@85	85	8.526e-05	0.895024	2	18.7547	0.164725	1850							18.7547						140	2587
R12882@86	86	5.926e-05	0.622087	2	21.4172	0.176926	1850							21.4172						140	2587
R12882@87	87	3.326e-05	0.34915	2	21.2401	0.187218	1850							21.2401						140	2587
R12882@88	88			1	10.7613	0.170941	1850						10.7613							140	2587
R12882@89	89			1	10.7691	0.164625	1850						10.7691							140	2587
R12882@90	90			1	10.4527	0.186299	1850						10.4527							140	2587
R12882@91	91			1	10.3001	0.178003	1850						10.3001							140	2587
R12882@92	92			1	10.5796	0.194827	1850						10.5796							140	2587
R12882@93	93	3.51e-05	0.908279	2	19.1658	0.1671	1850							19.1658						140	2587
R12882@94	94	2.5997e-05	0.672722	2	19.8757	0.1677	1850							19.8757						140	2587
R12882@95	95			1	13.4119	0.174026	1850						13.4119							140	2587
R12882@96	96			1	10.4331	0.186862	1850						10.4331							140	2587
R12882@97	97			1	10.1411	0.169657	1850						10.1411							140	2587
R12882@98	98			1	9.99716	0.179064	1850						9.99716							140	2587
R12882@99	99	0.00010823	0.94113	2	18.3138	0.191158	1850							18.3138						140	2587
R12882@100	100	7.0078e-05	0.609374	2	19.3796	0.195685	1850							19.3796						140	2587
R12882@101	101	5.1926e-05	0.45153	2	19.3539	0.179443	1850							19.3539						140	2587
R12882@102	102			1	12.9903	0.1752	1850						12.9903							140	2587
R12882@103	103			1	12.6574	0.169071	1850						12.6574							140	2587
R12882@104	104			1	12.6455	0.188985	1850						12.6455							140	2587
R12882@105	105			1	12.8007	0.172879	1850						12.8007							140	2587
R12882@106	106			1	12.6961	0.160223	1850						12.6961							140	2587
R12882@107	107	2.8265e-05	0.272828	2	19.6894	0.179558	1850							19.6894						140	2587
R12882@108	108	6.3532e-05	0.613243	2	16.7713	0.188117	1850							16.7713						140	2587
R12882@109	109	9.8799e-05	0.953658	2	17.3517	0.192218	1850							17.3517						140	2587
R12882@110	110	0.000124066	0.91225	2	16.8089	0.189346	1850							16.8089						140	2587
R12882@111	111	8.74686e-05	0.643151	2	19.0772	0.179139	1850							19.0772						140	2587
R12882@112	112	9.8322e-05	0.722956	2	18.2633	0.19033	1850							18.2633						140	2587
R12882@113	113	6.17246e-05	0.453857	2	19.7986	0.180816	1850							19.7986						140	2587
R12882@114	114			1	10.7242	0.16989	1850						10.7242							140	2587
R12882@115	115			4	15.882	0.309187	1850													140	2587
R12882@116	116			4	16.1642	0.304006	1850													140	2587
R12882@117	117			4	14.948	0.302939	1850													140	2587
R12882@118	118			4	15.4051	0.30458	1850													140	2587
R12882@119	119			4	14.6327	0.297949	1850													140	2587
R12882@120	120			4	14.4228	0.293775	1850													140	2587
R12882@121	121			4	13.4236	0.302317	1850													140	2587
R12882@122	122			4	14.4679	0.306708	1850													140	2587
R12882@123	123			4	16.1572	0.305582	1850													140	2587
R12882@124	124			4	15.6677	0.307476	1850													140	2587
R12882@125	125			4	15.7241	0.310106	1850													140	2587

## Sheet: d18-D2537
Analysis Name	numero	distance to grain	ratio	property	d18O	Error	depth	debut	fin		DeltaO		Dq	Oq	error	Min	Mean	Max	n	T	depth
D2537@1	1			1	7.48355	0.0659743	1850	2	6		3.21465		7.48355		0.0588184	3.7249	10.9398	14.9873	45	145	2534
D2537@2	2	1.85942e-05		2	16.1549	0.079686	1850	10	14		1.88311			16.1549						145	2534
D2537@3	3	1.85942e-06		2	15.9187	0.0881811	1850	23	23					15.9187	error	Min	Mean	Max	n	145	2534
D2537@4	4	1.85942e-07		2	18.9001	0.06012	1850	25	27		2.98417			18.9001	0.0687356	14.1142	19.0911	24.6384	74	145	2534
D2537@5	5	1.85942e-08		2	20.0341	0.0623898	1850	44	47		5.82862			20.0341						145	2534
D2537@6	6	1.85942e-09		2	19.1333	0.0747572	1850	52	54		-1.71418			19.1333						145	2534
D2537@7	7			1	11.0416	0.0748401	1850	60	63		5.66586		11.0416							145	2534
D2537@8	8			1	11.5532	0.0729587	1850	64	67		0.163488		11.5532							145	2534
D2537@9	9			1	11.2648	0.0503573	1850	68	76		2.54094		11.2648							145	2534
D2537@10	10	3.59735e-05	0.513907	2	16.979	0.0825918	1850	80	82		-6.29741			16.979						145	2534
D2537@11	11	4.4174e-05	0.631057	2	17.2554	0.0522489	1850	83	84		0.350944			17.2554						145	2534
D2537@12	12	2.8842e-05	0.412028	2	18.0008	0.0643851	1850	88	90		2.38112			18.0008						145	2534
D2537@13	13	5.6384e-05	0.805486	2	17.2064	0.0483254	1850	96	102		0.136074			17.2064						145	2534
D2537@14	14	6.39895e-05	0.914136	2	16.1177	0.0767858	1850	105	113		-2.63999			16.1177						145	2534
D2537@15	15			1	14.7403	0.0790519	1850	117	119		2.99477		14.7403							145	2534
D2537@16	16			1	11.1012	0.0648918	1850						11.1012							145	2534
D2537@17	17			1	10.7103	0.0632888	1850						10.7103							145	2534
D2537@18	18			2	16.2026	0.0515805	1850							16.2026						145	2534
D2537@19	19			2	15.3248	0.0618574	1850							15.3248						145	2534
D2537@20	20			2	15.3032	0.0614426	1850							15.3032						145	2534
D2537@21	21			1	10.4455	0.0645488	1850						10.4455							145	2534
D2537@22	22			1	10.3159	0.0449989	1850						10.3159							145	2534
D2537@23	23	5.66657e-05	0.240529	2	18.8528	0.0667255	1850							18.8528						145	2534
D2537@24	24			1	14.9873	0.0683612	1850						14.9873							145	2534
D2537@25	25	9.65678e-05	0.409902	2	17.8079	0.0725799	1850							17.8079						145	2534
D2537@26	26	6.56785e-05	0.278786	2	18.1277	0.0764149	1850							18.1277						145	2534
D2537@27	27	2.65887e-05	0.112861	2	20.7921	0.0958182	1850							20.7921						145	2534
D2537@28	28			1	10.4643	0.072748	1850						10.4643							145	2534
D2537@29	29			1	11.5521	0.0683553	1850						11.5521							145	2534
D2537@30	30			1	11.4155	0.0593201	1850						11.4155							145	2534
D2537@31	31			1	11.5346	0.0669175	1850						11.5346							145	2534
D2537@32	32			1	7.97828	0.0536221	1850						7.97828							145	2534
D2537@33	33			1	6.31316	0.0771584	1850						6.31316							145	2534
D2537@34	34			1	11.5283	0.0549816	1850						11.5283							145	2534
D2537@35	35			1	4.28067	0.0448081	1850						4.28067							145	2534
D2537@36	36				-0.733022	0.0667553	1850													145	2534
D2537@37	37				-1.94008	0.105133	1850													145	2534
D2537@38	38			1	3.7249	0.0375942	1850						3.7249							145	2534
D2537@39	39			2	17.5187	0.0777111	1850							17.5187						145	2534
D2537@40	40			2	24.6384	0.075493	1850							24.6384						145	2534
D2537@41	41			1	9.78915	0.0756448	1850						9.78915							145	2534
D2537@42	42			1	9.04548	0.0578217	1850						9.04548							145	2534
D2537@43	43			1	9.39641	0.0582286	1850						9.39641							145	2534
D2537@44	44	5.65547e-05	0.796545	2	16.3694	0.0552235	1850							16.3694						145	2534
D2537@45	45	4.58548e-05	0.645842	2	17.2495	0.0540632	1850							17.2495						145	2534
D2537@46	46	2.54554e-05	0.358527	2	22.342	0.055571	1850							22.342						145	2534
D2537@47	47	1.71115e-05	0.241007	2	22.198	0.0598572	1850							22.198						145	2534
D2537@48	48			1	13.6774	0.0677749	1850						13.6774							145	2534
D2537@49	49			1	11.3265	0.0621967	1850						11.3265							145	2534
D2537@50	50			1	11.1718	0.0554283	1850						11.1718							145	2534
D2537@51	51			1	11.9663	0.0580223	1850						11.9663							145	2534
D2537@52	52	4.7784e-05	0.357517	2	21.1068	0.0658719	1850							21.1068						145	2534
D2537@53	53	3.44778e-05	0.257961	2	20.4894	0.086918	1850							20.4894						145	2534
D2537@54	54	8.44552e-05	0.63189	2	22.2035	0.0584313	1850							22.2035						145	2534
D2537@55	55			1	12.5378	0.0778274	1850						12.5378							145	2534
D2537@56	56			2	19.4591	0.0702947	1850							19.4591						145	2534
D2537@57	57			2	17.031	0.0552139	1850							17.031						145	2534
D2537@58	58			2	21.7038	0.0470167	1850							21.7038						145	2534
D2537@59	59			1	9.2931	0.0795812	1850						9.2931							145	2534
D2537@60	60	3.33296e-05	0.41662	2	16.9909	0.050795	1850							16.9909						145	2534
D2537@61	61	2.67379e-05	0.334224	2	17.787	0.0695406	1850							17.787						145	2534
D2537@62	62	1.08448e-05	0.13556	2	18.8896	0.0613031	1850							18.8896						145	2534
D2537@63	63	7.16896e-05	0.896119	2	24.5555	0.0601352	1850							24.5555						145	2534
D2537@64	64	3.86349e-05	0.482936	2	14.1419	0.0473486	1850							14.1419						145	2534
D2537@65	65	4.88069e-05	0.610086	2	14.6311	0.0571777	1850							14.6311						145	2534
D2537@66	66	2.03484e-05	0.254355	2	14.2456	0.0631309	1850							14.2456						145	2534
D2537@67	67	1.93174e-05	0.241468	2	14.7946	0.062499	1850							14.7946						145	2534
D2537@68	68	4.79616e-05	0.685166	2	21.0391	0.0714041	1850							21.0391						145	2534
D2537@69	69	3.0752e-05	0.61504	2	22.1465	0.0586274	1850							22.1465						145	2534
D2537@70	70	2.57786e-05	0.515572	2	22.1932	0.0560235	1850							22.1932						145	2534
D2537@71	71	2.36048e-05	0.472097	2	22.5749	0.0580722	1850							22.5749						145	2534
D2537@72	72	1.58265e-05	0.316531	2	21.8931	0.0744449	1850							21.8931						145	2534
D2537@73	73	1.93174e-05	0.386349	2	21.2145	0.0675495	1850							21.2145						145	2534
D2537@74	74	6.21755e-05	0.888221	2	19.3521	0.0548906	1850							19.3521						145	2534
D2537@75	75	3.3914e-05	0.84785	2	19.0629	0.0537666	1850							19.0629						145	2534
D2537@76	76	4.89115e-05	0.815191	2	19.0004	0.0604738	1850							19.0004						145	2534
D2537@77	77	3.01646e-05	0.502744	2	22.8549	0.0434674	1850							22.8549						145	2534
D2537@78	78			1	11.8225	0.0542955	1850						11.8225							145	2534
D2537@79	79			1	10.3313	0.0430153	1850						10.3313							145	2534
D2537@80	80	2.7319e-05	0.27319	2	16.7217	0.0546396	1850							16.7217						145	2534
D2537@81	81	4.22377e-05	0.422377	2	23.8773	0.0470449	1850							23.8773						145	2534
D2537@82	82	7.08145e-05	0.708145	2	23.0191	0.0464909	1850							23.0191						145	2534
D2537@83	83	6.30634e-05	0.630634	2	20.9957	0.050155	1850							20.9957						145	2534
D2537@84	84	3.74251e-05	0.374251	2	21.3466	0.0559704	1850							21.3466						145	2534
D2537@85	85	0	0	1	14.754	0.0465685	1850						14.754							145	2534
D2537@86	86			1	12.1417	0.0484205	1850						12.1417							145	2534
D2537@87	87			1	11.7957	0.053276	1850						11.7957							145	2534
D2537@88	88	7.2983e-05	0.912287	2	19.6879	0.0495501	1850							19.6879						145	2534
D2537@89	89	3.50991e-05	0.438739	2	20.6709	0.0524341	1850							20.6709						145	2534
D2537@90	90	2.32777e-05	0.290972	2	22.069	0.0688885	1850							22.069						145	2534
D2537@91	91			1	13.0981	0.0469713	1850						13.0981							145	2534
D2537@92	92			1	10.8315	0.0496227	1850						10.8315							145	2534
D2537@93	93			1	9.27756	0.0510461	1850						9.27756							145	2534
D2537@94	94			1	9.28627	0.0539776	1850						9.28627							145	2534
D2537@95	95			1	8.98025	0.0514727	1850						8.98025							145	2534
D2537@96	96	6.29823e-05	0.251929	2	19.9964	0.0521468	1850							19.9964						145	2534
D2537@97	97	8.49582e-05	0.339833	2	19.0734	0.0486566	1850							19.0734						145	2534
D2537@98	98	0.000101238	0.404953	2	19.2095	0.0533031	1850							19.2095						145	2534
D2537@99	99	0.000136032	0.544129	2	18.9342	0.0529536	1850							18.9342						145	2534
D2537@100	100	0.000154969	0.619875	2	19.6902	0.0613878	1850							19.6902						145	2534
D2537@101	101	0.000181397	0.725587	2	20.6511	0.0429037	1850							20.6511						145	2534
D2537@102	102	0.000200702	0.802807	2	20.9111	0.0623718	1850							20.9111						145	2534
D2537@103	103			1	13.3581	0.0570496	1850						13.3581							145	2534
D2537@104	104			1	13.3617	0.0311747	1850						13.3617							145	2534
D2537@105	105	2.13296e-05	0.250937	2	16.9557	0.0495215	1850							16.9557						145	2534
D2537@106	106	2.57786e-05	0.303278	2	16.8157	0.056099	1850							16.8157						145	2534
D2537@107	107	3.36112e-05	0.395426	2	20.6547	0.0487147	1850							20.6547						145	2534
D2537@108	108	3.89744e-05	0.458523	2	19.8853	0.0527127	1850							19.8853						145	2534
D2537@109	109	5.21977e-05	0.614091	2	19.6651	0.0547369	1850							19.6651						145	2534
D2537@110	110	5.93468e-05	0.698198	2	19.4163	0.0553936	1850							19.4163						145	2534
D2537@111	111	7.8971e-05	0.929071	2	19.5957	0.0592847	1850							19.5957						145	2534
D2537@112	112	6.69557e-05	0.904807	2	18.3157	0.0488179	1850							18.3157						145	2534
D2537@113	113	4.12582e-05	0.557543	2	21.035	0.0564023	1850							21.035						145	2534
D2537@114	114			1	12.8346	0.0579843	1850						12.8346							145	2534
D2537@115	115			1	13.167	0.0631665	1850						13.167							145	2534
D2537@116	116			1	13.7281	0.0565086	1850						13.7281							145	2534
D2537@117	117	3.56845e-05	0.69669	2	14.1142	0.0409133	1850							14.1142						145	2534
D2537@118	118	4.88412e-05	0.953558	2	14.3257	0.0500815	1850							14.3257						145	2534
D2537@119	119	2.54547e-05	0.496967	2	17.3204	0.0530603	1850							17.3204						145	2534
D2537@120	120			1	11.4233	0.0473778	1850						11.4233							145	2534
D2537@121	121			1	11.4607	0.0575975	1850						11.4607							145	2534

## Sheet: d18-E2671
Analysis Name	numero	distance to grain	ratio	Property	d 18O /16O	Error	DEPTH	debut	fin				Dq	Oq	error	Min	Mean	Max	n	T	depth
E2671@1	1	4.12e-05	0.762963	2	18.5677	0.241504	1850	1	1					18.5677	0.256486	9.10315	11.4469	13.8743	3	140	2673
E2671@2	2	2.68457e-05	0.559285	2	19.3487	0.240876	1850	2	2					19.3487						140	2673
E2671@3	3	3.9445e-05	0.839255	2	18.2743	0.236015	1850	3	3					18.2743	error	Min	Mean	Max	n	140	2673
E2671@4	4	4.72269e-05	0.694513	2	18.9839	0.268613	1850	4	4					18.9839	0.232671	17.144	19.4963	22.3117	14	140	2673
E2671@5	5	2.15598e-05	0.567363	2	19.5936	0.247455	1850	5	5					19.5936						140	2673
E2671@6	6	7.46689e-05	0.769782	2	17.144	0.231936	1850	6	6					17.144						140	2673
E2671@7	7	2.355e-05	0.294375	2	20.7834	0.257981	1850	7	7					20.7834						140	2673
E2671@8	8			3	16.7838	0.217479	1850	9	9											140	2673
E2671@9	9	1.85541e-05	0.168674	2	20.9756	0.22017	1850	11	11					20.9756						140	2673
E2671@10	10			1	13.8743	0.247531	1850	14	14				13.8743							140	2673
E2671@11	11	8.18845e-05	0.731112	2	19.0428	0.230914	1850	15	15					19.0428						140	2673
E2671@12	12			1	11.3633	0.240297	1850	17	17				11.3633							140	2673
E2671@13	13			3	18.3134	0.211357	1850	20	20											140	2673
E2671@14	14	4.54112e-05	0.825659	2	19.0646	0.224845	1850	21	21					19.0646						140	2673
E2671@15	15	2.45871e-05	0.27319	2	22.3117	0.227415	1850							22.3117						140	2673
E2671@16	16			1	9.10315	0.281631	1850						9.10315							140	2673
E2671@17	17	1.453e-05	0.242167	2	20.5348	0.236436	1850							20.5348						140	2673
E2671@18	18			3	19.3386	0.218819	1850													140	2673
E2671@19	19			3	16.307	0.218551	1850													140	2673
E2671@20	20	3.5112e-05	0.780267	2	19.8372	0.216531	1850							19.8372						140	2673
E2671@21	21	3.112e-05	0.691556	2	18.4861	0.241188	1850							18.4861						140	2673

[truncated: 7 more sheets: d18-F3225, Data_ArAr, d18-X009, d18-X024, d18-EPS1360, d18-B002, d18-K466]
